# Supplementary material for: Gas phase-based growth of highly sensitive single-crystal rectangular micro- and nanotubes
Source: Royal Society of Chemistry journal article supplement (doi:10.1039/c1jm14238k), 2011-11-16
Supplement: c1jm14238k.pdf [file c1jm14238k.pdf]

Electronic Supplementary Information for

**Gas Phase-Based Growth of Highly Sensitive Single-Crystal  
Rectangular Micro- and Nanotubes**

**Ruijian Yuan,<sup>b</sup> Yongwei Huang,<sup>\*a</sup> and Shaomin Zhou<sup>\*b</sup>**

<sup>a</sup> *Medical College, Henan University, Kaifeng 475004, China. E-mail: hywei79@126.com*

<sup>b</sup> *Key Lab for Special Functional Materials of Ministry of Education, Henan University, Kaifeng 475004, China. E-mail: smzhou@henu.edu.cn*

## Supporting Figures

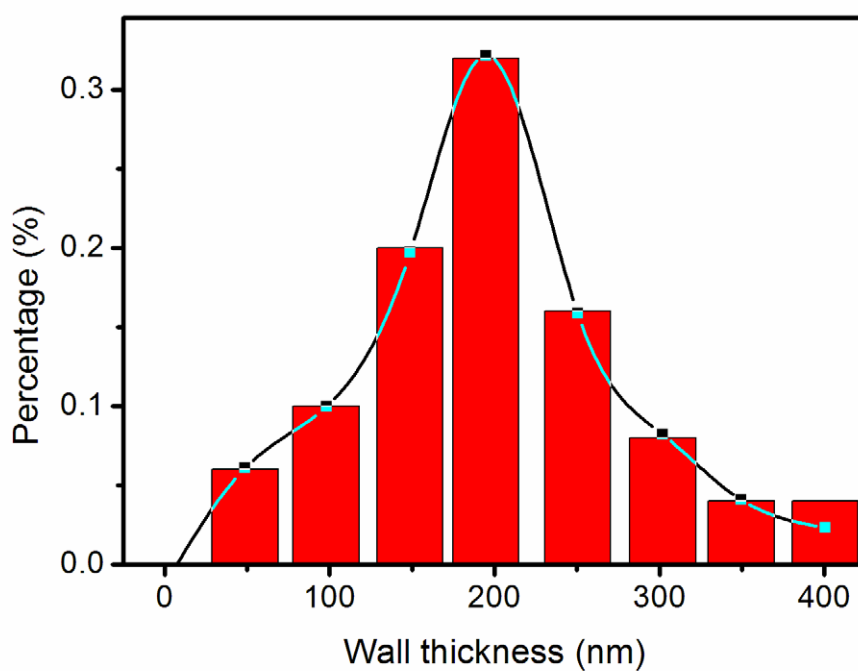

**Fig. S1** The size distribution of wall thickness of PTCDA M/NTs that identified and analyzed based on 50 samples

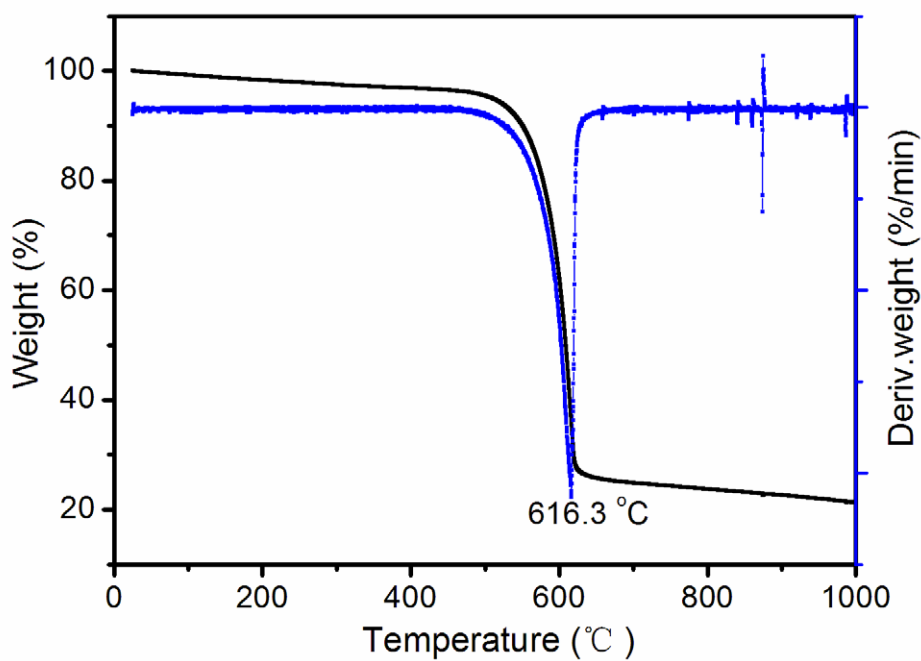

**Fig. S2** TGA curve of PTCDA power that indicates degradation temperature is approximately 616.3 °C.
